# Supplementary material for: Rectangular and hexagonal doping of graphene with B, N, and O: a DFT study
Source: Royal Society of Chemistry journal article supplement (doi:10.1039/c6ra28837e), 2017-01-01
Supplement: c6ra28837e1.pdf [file c6ra28837e1.pdf]

## Electronic supplementary information

### Rectangular and Hexagonal Doping of B, N, and O in Graphene: A DFT Study

Saif Ullah<sup>a\*</sup>, Akhtar Hussain<sup>b</sup>, and Fernando Sato<sup>a</sup>

<sup>a</sup>Departamento de Física, Instituto de Ciências Exatas, Campus Universitário, Universidade Federal de Juiz de Fora, Juiz de Fora, MG 36036-900, Brazil

\*E-mail: sullah@fisica.ufjf.br

<sup>b</sup>TPD, Pakistan Institute of Nuclear Science and Technology (PINSTECH), P. O. Nilore, Islamabad, Pakistan.

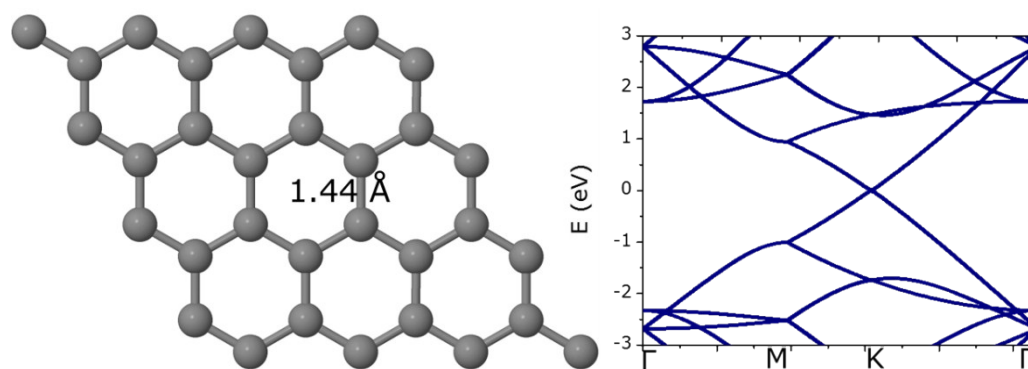

**Figure S1:** Optimized geometry of graphene along with its corresponding band structure. The conduction and valence band touched at Dirac point. The Fermi energy is set to zero.

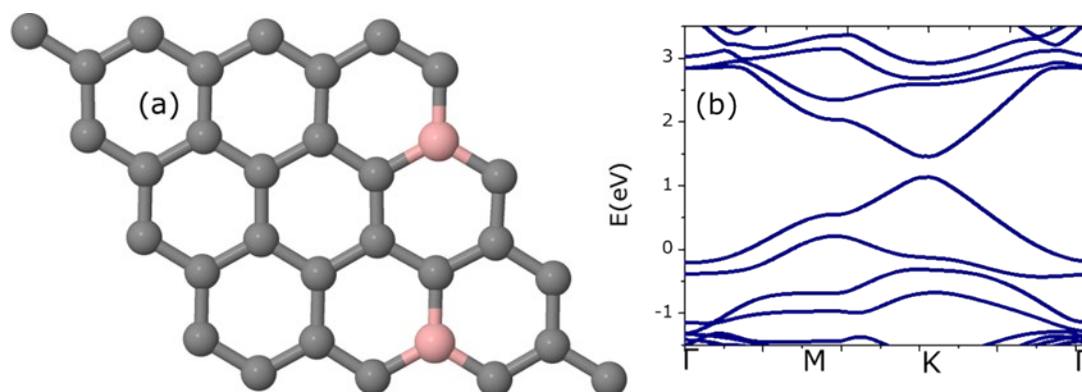

**Figure S2:** *Optimized geometry of graphene sheet doped with two B atoms at rectangular sites (a) along with the corresponding band structure graph (b)*

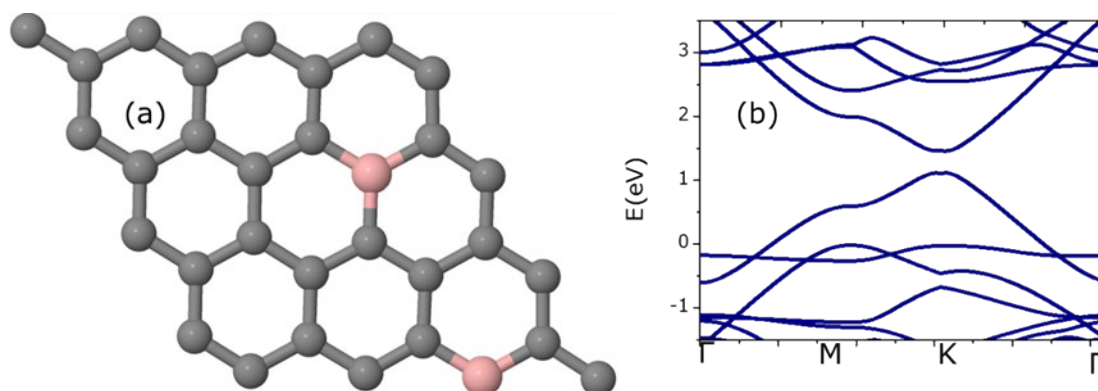

**Figure S3:** *Optimized geometry of graphene sheet doped with two B atoms at hexagonal sites (a) along with the corresponding band structure graph (b)*

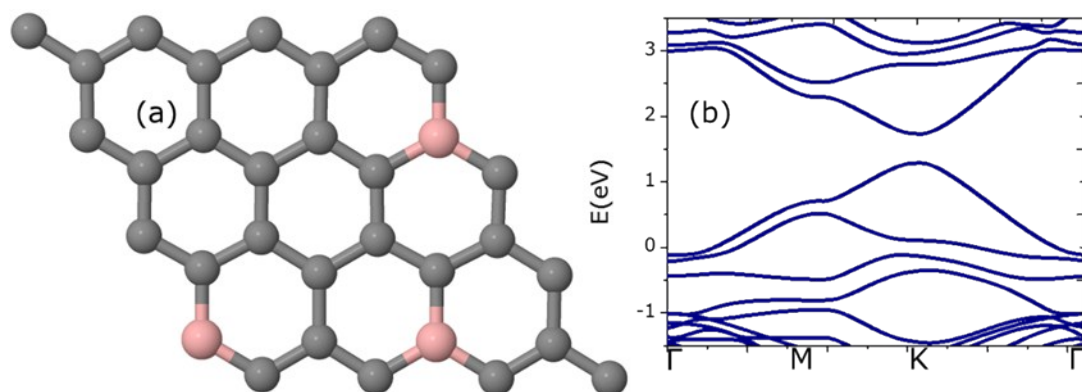

**Figure S4:** *Graphene sheet doped with three B at rectangular sites is shown in part (a) The band structure obtained from this system is shown in part (b)*

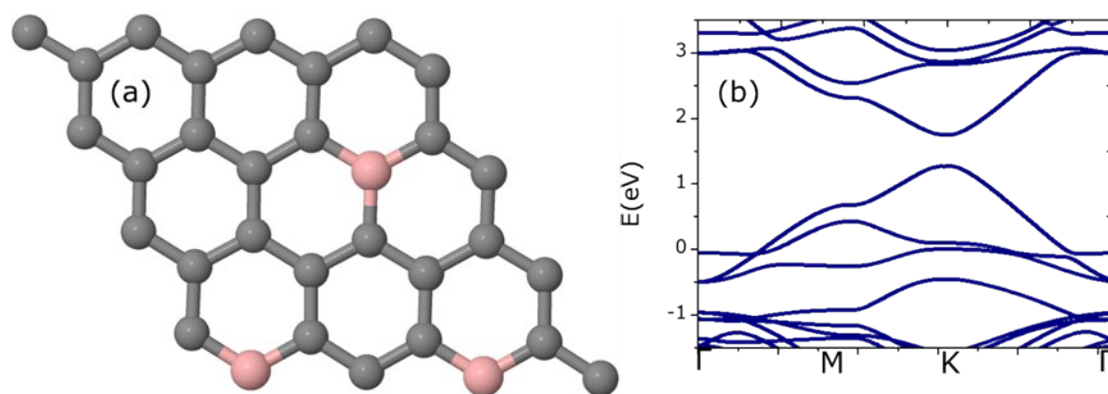

**Figure S5:** Graphene sheet doped with three B at hexagonal sites is shown in part (a) The band structure obtained from this system is shown in part (b)

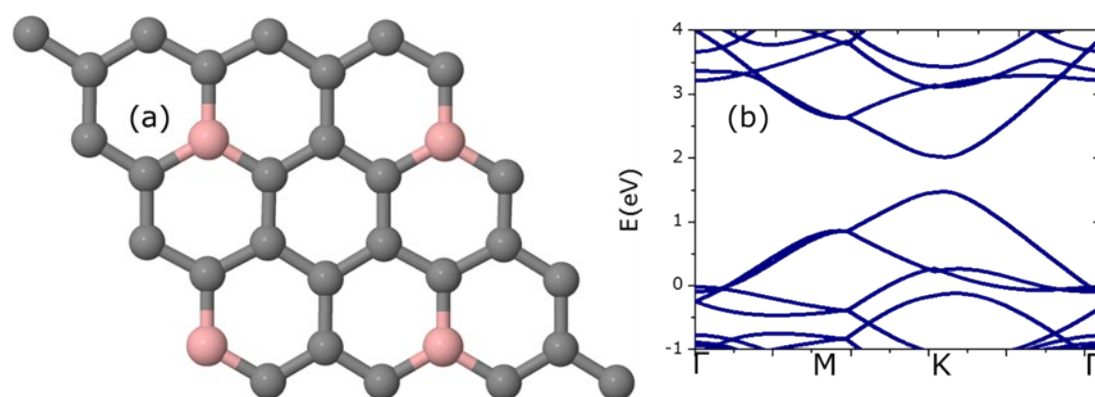

**Figure S6:** Four B atoms doped in graphene sheet (rectangular configuration) is depicted in (a). The band structure graph is drawn in (b)

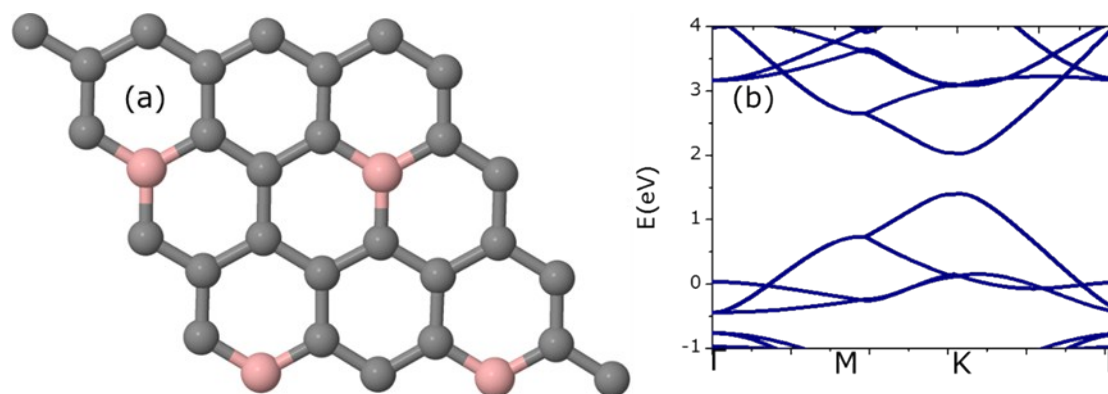

**Figure S7:** Four B atoms doped in graphene sheet (hexagonal configuration) is depicted in (a). The band structure graph is drawn in (b)

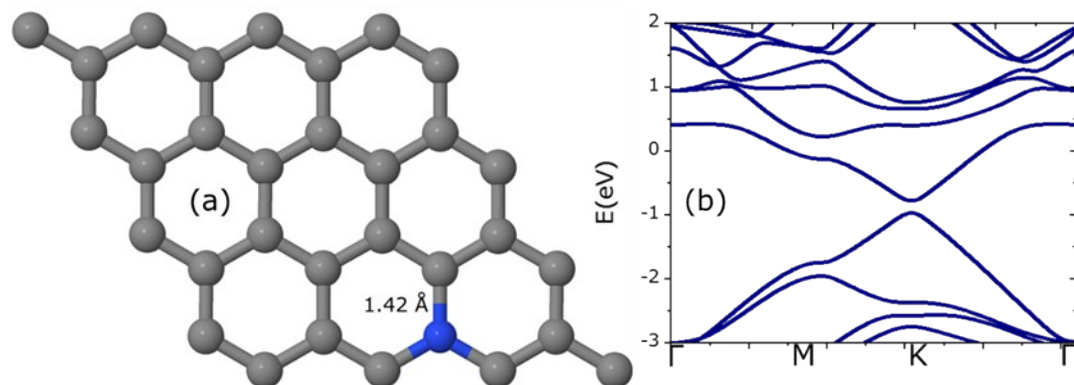

**Figure S8:** Graphene sheet of 4 x 4 supercell doped with single N atom (a) along with the corresponding band structure graph (b)

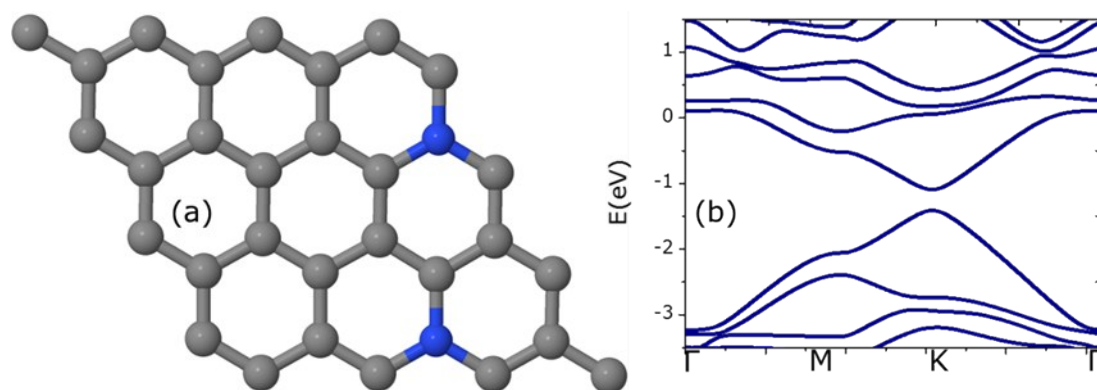

**Figure S9:** Two N atoms doped in graphene sheet (rectangular configuration) is depicted in (a). The band structure graph is drawn in (b)

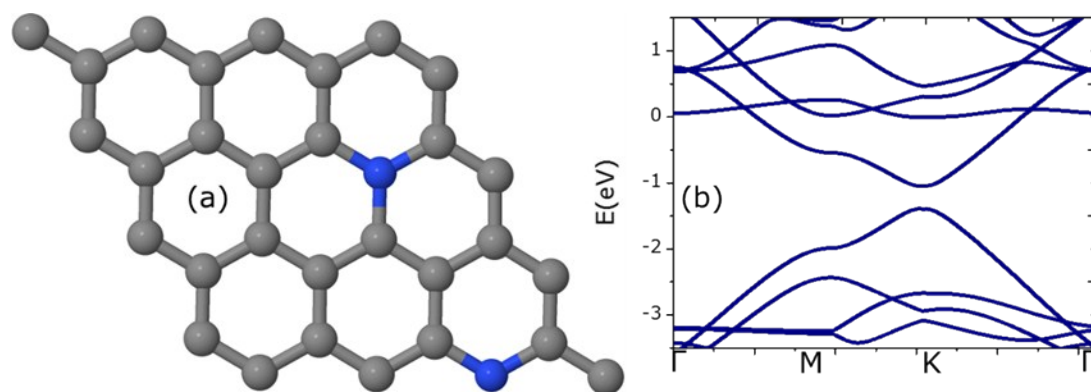

**Figure S10:** Two N atoms doped in graphene sheet (hexagonal configuration) is depicted in (a). The band structure graph is drawn in (b)

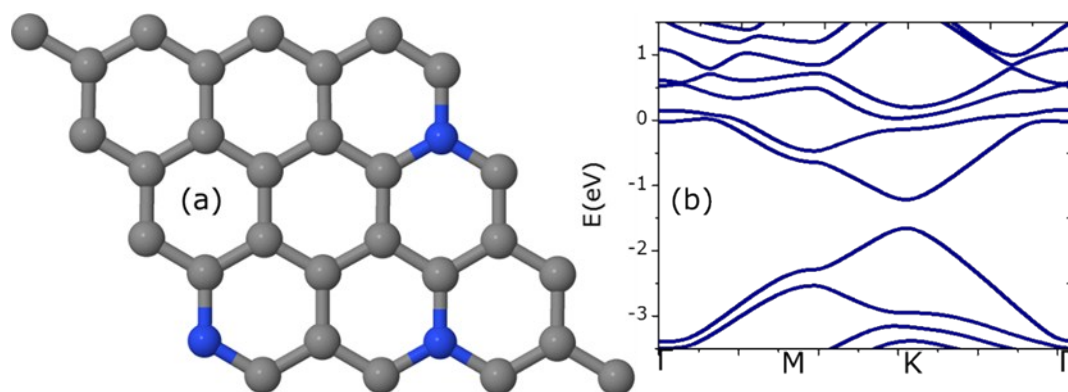

**Figure S11:** Optimized geometry of graphene sheet doped with three N atom at rectangular sites (a) along with the corresponding band structure graph (b)

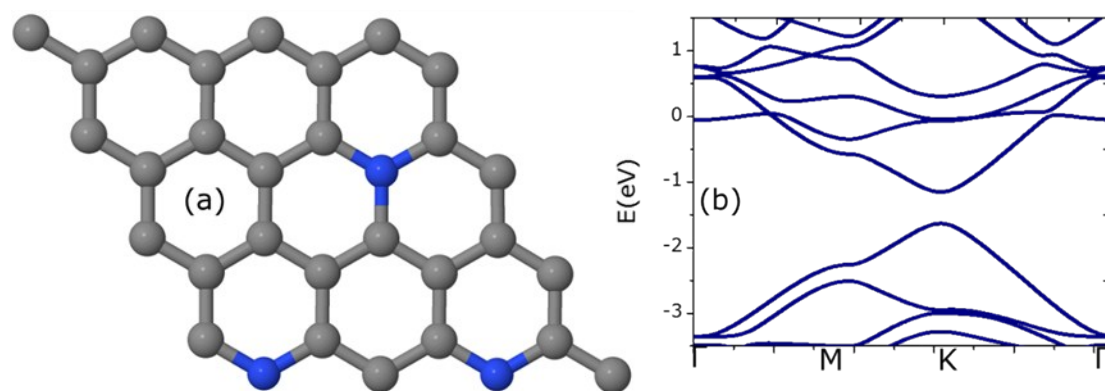

**Figure S12:** Optimized geometry of graphene sheet doped with three N atom at hexagonal sites (a) along with the corresponding band structure graph (b)

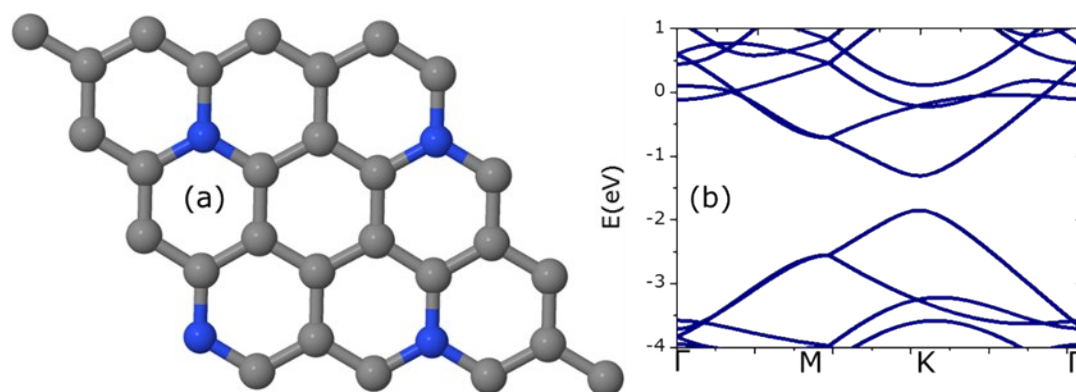

**Figure S13:** Graphene sheet doped with four N atom at rectangular sites is shown in part (a) The band structure obtained from this system is shown in part (b)

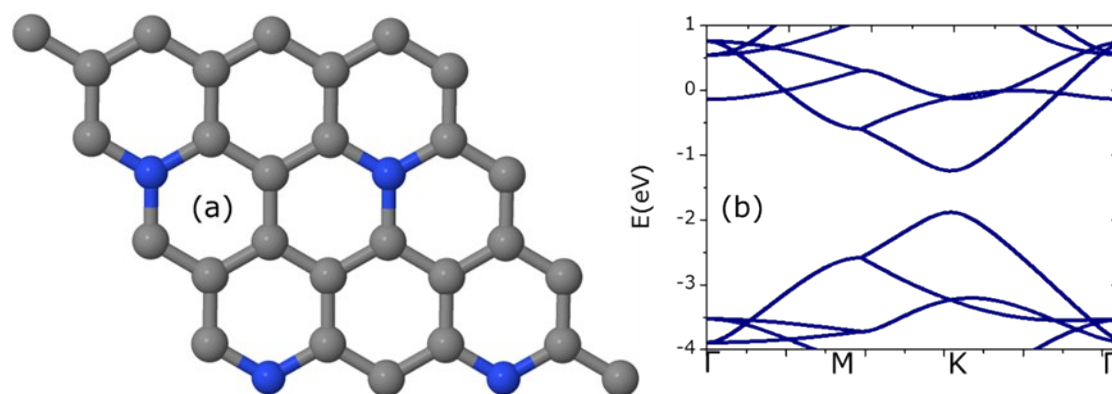

**Figure S14:** Graphene sheet doped with four N atoms at hexagonal sites is shown in part (a) The band structure obtained from this system is shown in part (b)

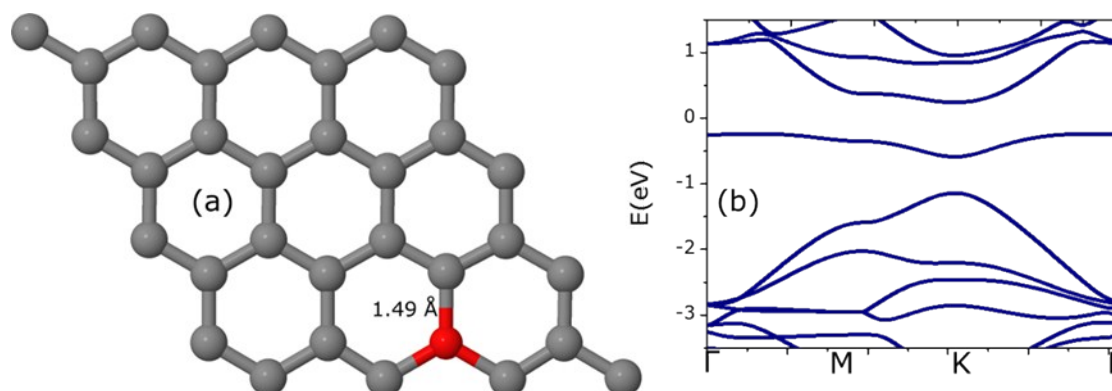



**Figure S15:** Graphene sheet is doped with single O atom (a). The band structure calculated for this optimized geometry is drawn in (b)

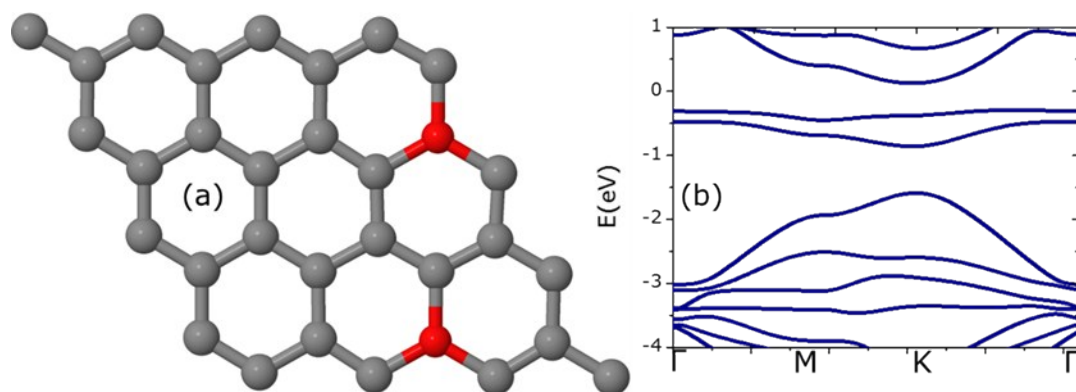

**Figure S16:** Optimized geometry of graphene sheet doped with two O atoms at rectangular sites (a) along with the corresponding band structure graph (b)

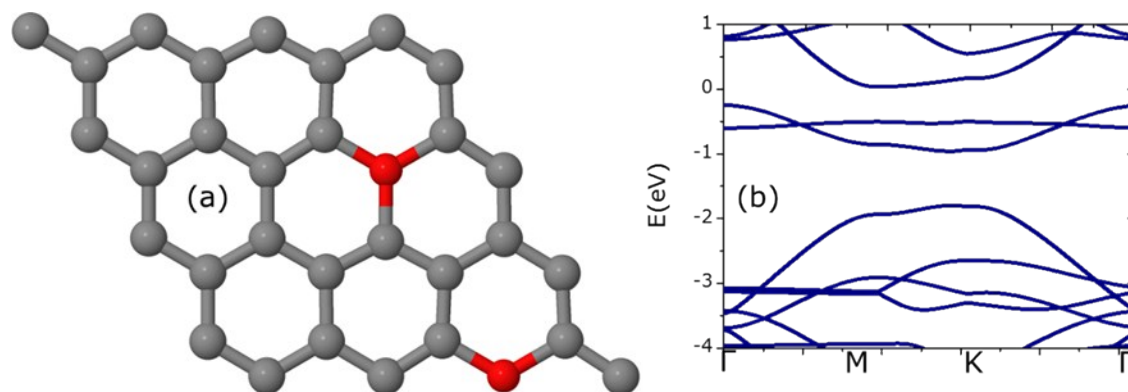

**Figure S17:** Optimized geometry of graphene sheet doped with two O atoms at hexagonal sites (a) along with the corresponding band structure graph (b)

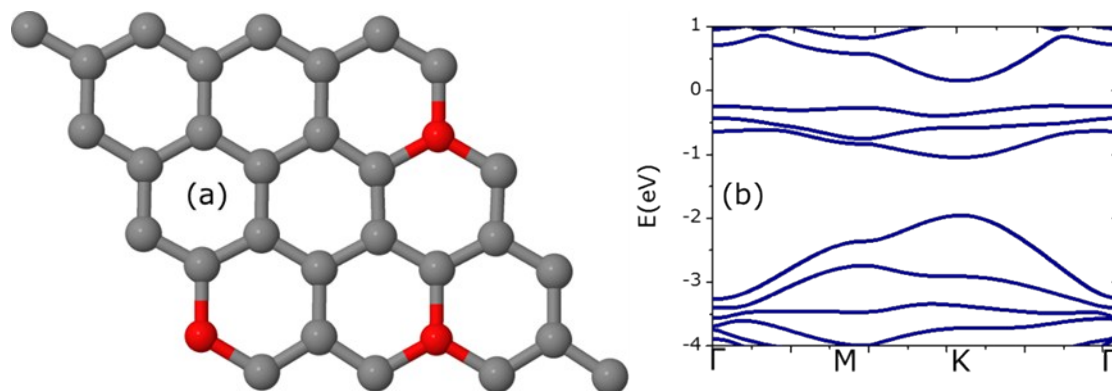

**Figure S18:** Graphene sheet doped with three O atoms at rectangular sites is shown in part (a) The band structure obtained from this system is shown in part (b)

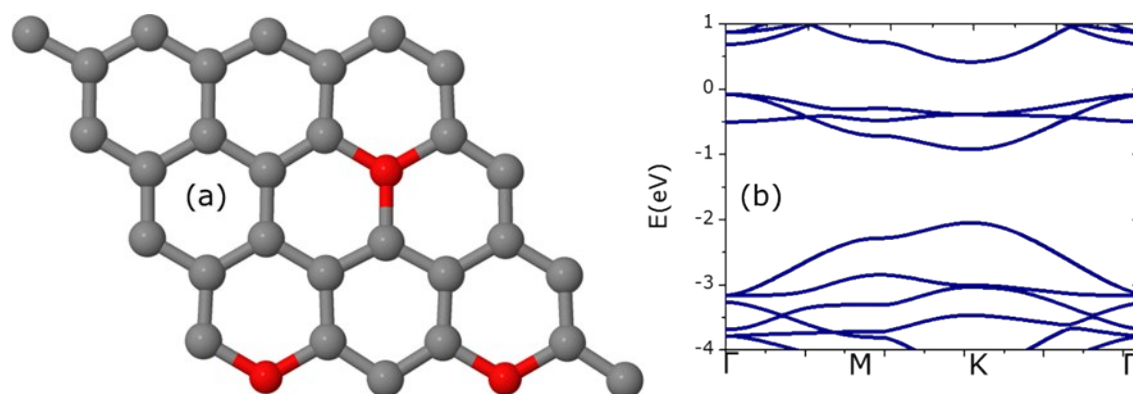

**Figure S19:** Graphene sheet doped with three O atoms at hexagonal sites is shown in part (a) The band structure obtained from this system is shown in part (b)

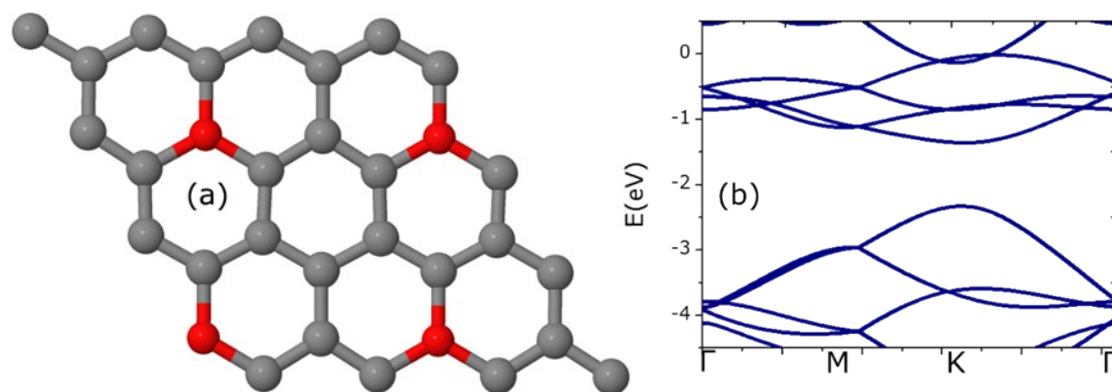

**Figure S20:** Optimized geometry of graphene sheet doped with four O atoms at rectangular sites (a) along with the corresponding band structure graph (b)

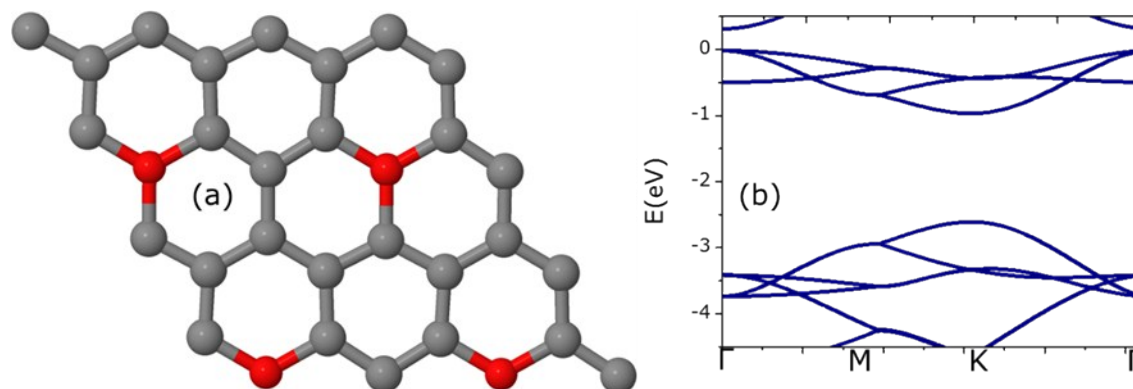



**Figure S21:** *Optimized geometry of graphene sheet doped with four O atoms at hexagonal sites (a) along with the corresponding band structure graph (b)*
